# Supplementary material for: Using the STROBE statement to assess reporting in blindness prevalence surveys in low and middle income countries
Source: PubMed Central journal article supplement (PMC5421753; doi:10.1371/journal.pone.0176178), 2017-05-08
Supplement: pone.0176178.s001.pdf [file pone.0176178.s001.pdf]

## Search History (4)

[View Saved](#)

| <input type="checkbox"/> | # ▲ | Searches                                                                                                                                                                                                                                                           | Results | Type     | Actions                                                | Annotations |
|--------------------------|-----|--------------------------------------------------------------------------------------------------------------------------------------------------------------------------------------------------------------------------------------------------------------------|---------|----------|--------------------------------------------------------|-------------|
| <input type="checkbox"/> | 1   | (blindness or vis* impairment or low vision).mp.<br>[mp=title, abstract, original title, name of substance word, subject heading word, keyword heading word, protocol supplementary concept word, rare disease supplementary concept word, unique identifier]      | 43131   | Advanced | <a href="#">Display Results</a>   <a href="#">More</a> |             |
| <input type="checkbox"/> | 2   | (prevalence or rapid assessment or population-based).mp. [mp=title, abstract, original title, name of substance word, subject heading word, keyword heading word, protocol supplementary concept word, rare disease supplementary concept word, unique identifier] | 625451  | Advanced | <a href="#">Display Results</a>   <a href="#">More</a> |             |
| <input type="checkbox"/> | 3   | 1 and 2                                                                                                                                                                                                                                                            | 4054    | Advanced | <a href="#">Display Results</a>   <a href="#">More</a> |             |
| <input type="checkbox"/> | 4   | limit 3 to yr="2008 -Current"                                                                                                                                                                                                                                      | 2007    | Advanced | <a href="#">Display Results</a>   <a href="#">More</a> |             |
