# Supplementary material for: Using the STROBE statement to assess reporting in blindness prevalence surveys in low and middle income countries
Source: PubMed Central journal article supplement (PMC5421753; doi:10.1371/journal.pone.0176178), 2017-05-08
Supplement: pone.0176178.s003.pdf [file pone.0176178.s003.pdf]

**S1 Table:** List of blindness prevalence studies included in the evaluation of STROBE adherence.

| Citation                                                                                                                                                                                                                                                       |
|----------------------------------------------------------------------------------------------------------------------------------------------------------------------------------------------------------------------------------------------------------------|
| Al-Akily S, <i>et al.</i> Causes of blindness in people aged 50 years and over: community-based versus hospital-based study. <i>Eastern Mediterranean Health Journal</i> 2010;16(9):942-6.                                                                     |
| Al-Khatib T, <i>et al.</i> Rapid assessment of avoidable blindness in Amran and Lahj governorates of Yemen. <i>Sudanese Journal of Ophthalmology</i> 2013;5(1):9.                                                                                              |
| Araujo Filho A, <i>et al.</i> Prevalence of visual impairment, blindness, ocular disorders and cataract surgery outcomes in low-income elderly from a metropolitan region of Sao Paulo--Brazil. <i>Arquivos Brasileiros de Oftalmologia</i> 2008;71(2):246-53. |
| Arieta C, <i>et al.</i> Cataract remains an important cause of blindness in Campinas, Brazil. <i>Ophthalmic Epidemiology</i> 2009;16(1):58-63.                                                                                                                 |
| Bejiga A, <i>et al.</i> Cataract surgical coverage and outcome in Goro District, Central Ethiopia. <i>Ethiopian Medical Journal</i> 2008;46(3):205-10.                                                                                                         |
| Binnawi K, <i>et al.</i> Prevalence and causes of blindness and visual impairment in population aged 50 years and over in North Kordofan State, Sudan. <i>Albasar Int J Ophthalmol</i> 2015;3:6-10.                                                            |
| Binnawi K, <i>et al.</i> Prevalence and causes of blindness: Results from the rapid assessment of avoidable blindness survey in Gezira state, Sudan. <i>Sudanese Journal of Ophthalmology</i> 2013;5(1):17.                                                    |
| Budenz D, <i>et al.</i> Blindness and visual impairment in an urban West African population: the Tema Eye Survey. <i>Ophthalmology</i> 2012;119(9):1744-53.                                                                                                    |
| Chiang F, <i>et al.</i> Rapid Assessment of Avoidable Blindness in the Occupied Palestinian Territories. <i>Plos One</i> 2010;5(7); e11854.                                                                                                                    |
| Cockburn N, <i>et al.</i> Prevalence, Causes and Socio-Economic Determinants of Vision Loss in Cape Town, South Africa. <i>PLoS One</i> 2012;7(2):e30718.                                                                                                      |
| Dean W, <i>et al.</i> Follow-Up Survey of Cataract Surgical Coverage and Barriers to Cataract Surgery at Nkhoma, Malawi. <i>Ophthalmic Epidemiology</i> 2011;18(4):171-8.                                                                                      |
| Deepthi R, <i>et al.</i> Visual and hearing impairment among rural elderly of south India: A community-based study. <i>Geriatrics and Gerontology International</i> 2012;12(1):116-22.                                                                         |
| Dhake PV, <i>et al.</i> Prevalence and causes of avoidable blindness and severe visual impairment in a tribal district of Maharashtra, India. <i>Oman Journal of Ophthalmology</i> 2011;4(3):129-34.                                                           |
| Duerksen R, <i>et al.</i> Review of blindness and visual impairment in Paraguay: changes between 1999 and 2011. <i>Ophthalmic Epidemiology</i> 2013;20(5):301-7.                                                                                               |
| Dulal S, <i>et al.</i> Prevalence of blindness and visual impairment and its causes among people aged 50 years and above in Karnali Zone, Nepal. <i>Nepalese Journal of Ophthalmology</i> 2012;4(2):282-7.                                                     |
| Edussuriya K, <i>et al.</i> The prevalence and causes of visual impairment in central Sri Lanka the Kandy Eye study. <i>Ophthalmology</i> 2009;116(1):52-6.                                                                                                    |
| Fegghi M, <i>et al.</i> Prevalence and causes of blindness and low vision in Khuzestan province, Iran. <i>Journal of Ophthalmic &amp; Vision Research</i> 2009;4(1):29-34.                                                                                     |
| Govekar KP, Sharma MK. Blindness and visual impairment in the Delhi region. <i>National Journal of Community Medicine</i> 2014;5(4):370-2.                                                                                                                     |
| Govendar P, <i>et al.</i> Rapid assessment of avoidable blindness in the northern eThekweni district of KwaZulu-Natal Province, South Africa. <i>African Vision and Eye Health</i> 2015;74(1)                                                                  |

---

**Citation**

---

- Gupta N, *et al.* Rapid Assessment of Visual Impairment in urban population of Delhi, India. *PLoS One* 2015;10(4): e0124206.
- Gurudasani B, *et al.* Prevalence of Cataract and Cataract Blindness in Wardha District. *Scholars Journal of Applied Medical Sciences* 2014;2(4C):1361-6.
- Guruprasad B, *et al.* Changing scenario of cataract blindness in Kolar District, Karnataka, South India. The utility of rapid assessment of avoidable blindness in reviewing programs. *Ophthalmic Epidemiology* 2013;20(2):89-95.
- Habiyakire C, *et al.* Rapid assessment of avoidable blindness and cataract surgical services in Kilimanjaro region, Tanzania. *Ophthalmic Epidemiology* 2010;17(2):90-4.
- Harnagle R, *et al.* A prevalence study of visual impairment and blindness among elderly in an urban slum community of Pune cantonment, India. *Research Journal of Pharmaceutical, Biological and Chemical Sciences* 2013;4(4):1452-61.
- Hashemi H, *et al.* Visual impairment in the 40-to 64-year-old population of Shahroud, Iran. *Eye* 2012;26(8):1071-7.
- Hashemi H, *et al.* The Prevalence and Causes of Visual Impairment and Blindness in a Rural Population in the North of Iran. *Iran J Public Health* 2015;44(6):855-64.
- Huang S, *et al.* Prevalence and causes of visual impairment in Chinese adults in urban southern China. *Archives of Ophthalmology* 2009;127(10):1362-7.
- Isipradit S, *et al.* The First Rapid Assessment of Avoidable Blindness (RAAB) in Thailand. *PloS One* 2014;9(12):e114245.
- Jimenez-Corona A, *et al.* Social Determinants and Their Impact on Visual Impairment in Southern Mexico. *Ophthalmic Epidemiology* 2015;22(5):342-8.
- Kalua K, *et al.* Findings from a rapid assessment of avoidable blindness (RAAB) in Southern Malawi. *PLoS One* 2011;6(4):e19226.
- Kandeke L, *et al.* Rapid assessment of avoidable blindness in two northern provinces of Burundi without eye services. *Ophthalmic Epidemiology* 2012;19(4):211-5.
- Katibeh M, *et al.* Prevalence and Causes of Visual Impairment and Blindness in Central Iran; The Yazd Eye Study. *J Ophthalmic Vis Res.* 2015;10(3):279–85.
- Khanna RC. Prevalence and causes of blindness and visual impairment and their associated risk factors, in three tribal areas of Andhra Pradesh, India. *PloS One* 2014;9(7):e100644.
- Kolawole O, *et al.* Cataract blindness in Osun state, Nigeria: results of a survey. *Middle East African Journal of Ophthalmology* 2012;19(4):364-71.
- Kolawole O, *et al.* Survey of blindness and low vision in Egbedore, South-Western Nigeria. *West African Journal of Medicine* 2010;29(5):327-31.
- Kyari F, *et al.* Prevalence of blindness and visual impairment in Nigeria: the National Blindness and Visual Impairment Study. *Investigative Ophthalmology & Visual Science* 2009;50(5):2033-9.
- Lepcha N, *et al.* Rapid Assessment of Avoidable Blindness in Bhutan. *Ophthalmic Epidemiology* 2013;20(4):212-9.
- Li E, *et al.* Prevalence of blindness and outcomes of cataract surgery in Hainan Province in South China. *Ophthalmology* 2013;120(11):2176-83.
-

---

**Citation**

---

- Li J, *et al.* The prevalence and causes of visual impairment in an elderly Chinese Bai ethnic rural population: the Yunnan minority eye study. *Investigative Ophthalmology & Visual Science* 2012;53(8):4498-504.
- Li L, *et al.* Prevalence and causes of visual impairment among the elderly in Nantong, China. *Eye* 2008;22(8):1069-75.
- Li X, *et al.* Prevalence of blindness and low vision in a rural population in northern China: preliminary results from a population-based survey. *Ophthalmic Epidemiology* 2012;19(5):272-7.
- Li Z, *et al.* Prevalence and causes of blindness and visual impairment among the elderly in rural southern Harbin, China. *Ophthalmic Epidemiology* 2008;15(5):334-8.
- Li T, *et al.* Prevalence and Causes of Visual Impairment and Blindness in Shanxi Province, China. *Ophthalmic Epidemiology* 2015;22(4):239-45.
- Liang Y, *et al.* Prevalence and Causes of Low Vision and Blindness in a Rural Chinese Adult Population The Handan Eye Study. *Ophthalmology* 2008;115(11):1965-72.
- Lindfield R, *et al.* A rapid assessment of avoidable blindness in Southern Zambia. *PLoS One* 2012;7(6):e38483.
- Marmamula S, *et al.* Rapid assessment of visual impairment (RAVI) in marine fishing communities in South India--study protocol and main findings. *BMC Ophthalmology* 2011;11:26.
- Marmamula S, *et al.* Visual Impairment among Weaving Communities in Prakasam District in South India. *PLoS One* 2013;8(2):e55924.
- Marmamula S, *et al.* Visual Impairment in the South Indian State of Andhra Pradesh: Andhra Pradesh - Rapid Assessment of Visual Impairment (AP-RAVI) Project. *PLoS One* 2013;8(7):e70120.
- Mashayo E, *et al.* Prevalence of refractive error, presbyopia and spectacle coverage in Kahama District, Tanzania: a rapid assessment of refractive error. *Clinical & Experimental Optometry* 2015;98(1):58-64.
- Mathenge W, *et al.* The Nakuru Posterior Segment Eye Disease Study Methods and Prevalence of Blindness and Visual Impairment in Nakuru, Kenya. *Ophthalmology* 2012;119(10):2033-9.
- Minderhoud J, *et al.* Blindness and Visual Impairment in the Republic of Suriname. *Ophthalmology* 2015;122(10):2147-9.
- Mörchen M, *et al.* Prevalence of Blindness and Cataract Surgical Outcomes in Takeo Province, Cambodia. *The Asia-Pacific Journal of Ophthalmology* 2015;4(1):25-31.
- Mousa A, *et al.* Prevalence of Visual Impairment and Blindness in Upper Egypt: A Gender-based Perspective. *Ophthalmic Epidemiology* 2014;21(3):190-6.
- Mpyet C, *et al.* Prevalence and Causes of Blindness and Visual Impairment in Plateau State, Nigeria. *TAF Preventive Medicine Bulletin* 2010;9(5):401-6.
- Muhammad N, *et al.* Prevalence and causes of blindness and visual impairment in Sokoto State, Nigeria: Baseline data for Vision 2020: The right to sight eye care programme. *Middle East African Journal of Ophthalmology* 2011;18(2):123-8.
- Muller A, *et al.* Results of a rapid assessment of avoidable blindness (RAAB) in Eritrea. *Ophthalmic Epidemiology* 2011;18(3):103-8.
- Murthy GV, *et al.* Prevalence and causes of visual impairment and blindness in older adults in an area of India with a high cataract surgical rate. *Ophthalmic Epidemiology* 2010;17(4):185-95.
-

---

**Citation**

---

- Marmamula S, *et al.* Rapid assessment of visual impairment (RAVI) in marine fishing communities in South India--study protocol and main findings. *BMC Ophthalmology* 2011;11:26.
- Nangia V, *et al.* Visual impairment and blindness in rural central India: the Central India Eye and Medical Study. *Acta Ophthalmologica* 2013;91(5):483-6.
- Neena J, *et al.* Rapid Assessment of Avoidable Blindness India Study, Group. Rapid Assessment of Avoidable Blindness in India. *PLoS One* 2008;3(8):e2867.
- Patil S, *et al.* Prevalence, causes of blindness, visual impairment and cataract surgical services in Sindhudurg district on the western coastal strip of India. *Indian Journal of Ophthalmology* 2014;62(2):240-5.
- Polack S, *et al.* Rapid Assessment of Avoidable Blindness and Diabetic Retinopathy in Chiapas, Mexico. *Ophthalmology* 2012;119(5):1033-40.
- Rabiu M, *et al.* Prevalence and Causes of Visual Impairment and Blindness, Cataract Surgical Coverage and Outcomes of Cataract Surgery in Libya. *Ophthalmic Epidemiology* 2013;20(1):26-32.
- Rabiu M, *et al.* Prevalence of blindness and diabetic retinopathy in northern Jordan. *European Journal of Ophthalmology* 2015;25(4):320-7.
- Rabiu M, *et al.* Rapid Assessment of Cataract Surgical Services in Birnin-Kebbi Local Government Area of Kebbi State, Nigeria. *Ophthalmic Epidemiology* 2008;15(6):359-65.
- Rabiu M. Prevalence of blindness and low vision in north central, Nigeria. *West African Journal of Medicine* 2008;27(4):238-44.
- Rajavi Z, *et al.* Rapid Assessment of Avoidable Blindness in Iran. *Ophthalmology* 2011;118(9):1812-8.
- Ramke J, *et al.* Prevalence and causes of blindness and low vision among adults in Fiji. *Clinical and Experimental Ophthalmology* 2012;40(5):490-6.
- Ramke J, *et al.* Prevalence and Causes of Blindness and Low Vision Revisited after 5 years of Eye Care in Timor-Leste. *Ophthalmic Epidemiology* 2012;19(2):52-7.
- Randrianaivo J, *et al.* Blindness and cataract surgical services in Atsinanana region, Madagascar. *Middle East African Journal of Ophthalmology* 2014;21(2):153-7.
- Rius A, *et al.* Prevalence of visual impairment in El Salvador: inequalities in educational level and occupational status. *Pan American Journal of Public Health* 2014;36(5):290-9.
- Salomao S, *et al.* Prevalence and causes of vision impairment and blindness in older adults in Brazil: the Sao Paulo Eye Study. *Ophthalmic Epidemiology* 2008;15(3):167-75.
- Sapkota YD, *et al.* The Prevalence of Blindness and Cataract Surgery in Rautahat District, Nepal. *Ophthalmic Epidemiology* 2010;17(2):82-9.
- Sherchan A, *et al.* Blindness prevalence and cataract surgical coverage in Lumbini Zone and Chetwan District of Nepal. *British Journal of Ophthalmology* 2010;94(2):161-6.
- Singh N, *et al.* Prevalence and causes of blindness and visual impairment and their associated risk factors, in three tribal areas of Andhra Pradesh, India. *PLoS One* 2014;9(7):e100644.
- Song W, *et al.* Prevalence and causes of visual impairment in a rural North-east China adult population: a population-based survey in Bin County, Harbin. *Acta Ophthalmologica* 2010;88(6):669-74.
- Soori H, *et al.* Prevalence and causes of low vision and blindness in Tehran Province, Iran. *Journal of the Pakistan Medical Association* 2011;61(6):544-9.
-

---

**Citation**

---

- Tang Y, *et al.* Prevalence and Causes of Visual Impairment in a Chinese Adult Population: The Taizhou Eye Study. *Ophthalmology* 2015;122(7):1480-8.
- Thapa S, *et al.* Prevalence of visual impairment, cataract surgery and awareness of cataract and glaucoma in Bhaktapur district of Nepal: The Bhaktapur Glaucoma Study. *BMC Ophthalmology* 2011;11:2.
- Wei M, *et al.* Prevalence and causes of visual impairment and blindness in Sichuan province of China. *International Journal of Ophthalmology* 2010;3(1):83-8.
- Woldeyes A, Adamu Y. Gender differences in adult blindness and low vision, Central Ethiopia. *Ethiopian Medical Journal* 2008;46(3):211-8.
- Wu M, *et al.* Rapid assessment of avoidable blindness in Kunming, China. *Ophthalmology* 2008;115(6):969-74.
- Xiao B, *et al.* Rapid assessment of avoidable blindness in three counties, Jiangxi Province, China. *British Journal of Ophthalmology* 2010;94(11):1437-42.
- Xiao B, *et al.* The Prevalence of Blindness, Visual Impairment and Cataract Surgery in Tuoketuo and Shangdu Counties, Inner Mongolia, China. *Open Journal of Ophthalmology* 2015;5(01):23-30.
- Yaacov-Pena F, *et al.* Prevalence and causes of blindness in an urban area of Paraguay. *Arquivos Brasileiros de Oftalmologia* 2012;75(5):341-3.
- Yao Y, *et al.* Prevalence of blindness and causes of visual impairment among adults aged 50 years or above in southern Jiangsu province of China. *Pakistan Journal of Medical Sciences* 2013;29(5):1203-7.
- Zatic TB, *et al.* Rapid assessment of avoidable blindness and diabetic retinopathy in Republic of Moldova. *British Journal of Ophthalmology* 2015;99(6):832-6.
- Zhang Y, *et al.* Prevalence of blindness and low vision: a study in the rural Heilongjiang Province of China. *Clinical and Experimental Ophthalmology* 2012;40(5):484-9.
- Zhao J, *et al.* Prevalence of Vision Impairment in Older Adults in Rural China The China Nine-Province Survey. *Ophthalmology* 2010;117(3):409-U27.
- Zhu M, *et al.* Visual impairment and spectacle coverage rate in Baoshan district, China: population-based study. *BMC Public Health* 2013;13:311.
-
